# Supplementary material for: Antrodia cinnamomea, a Treasured Medicinal Mushroom, Induces Growth Arrest in Breast Cancer Cells, T47D Cells: New Mechanisms Emerge
Source: MDPI journal article supplement (doi:10.3390/ijms20040833), 2019-02-15
Supplement: s1 [file s1]

# ***Antrodia cinnamomea*, a Treasured Medicinal Mushroom, Induces Growth Arrest in Breast Cancer Cells, T47D Cells: New Mechanisms Emerge**

Supplementary Materials:

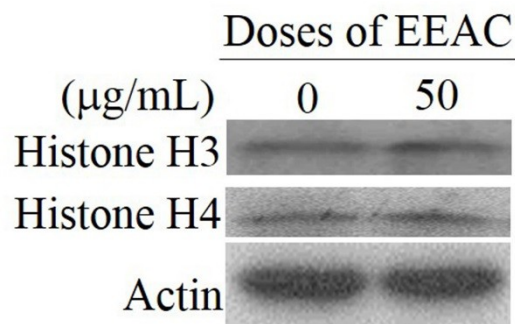

**Figure S1.** Expression of histone H3 and H4 protein after treated with EEAC for 48 h determined by Western blot assay. Actin was used as the loading control.
